# Supplementary material
Source: PubMed Central journal article supplement (PMC3790129)
Supplement: 13280_2013_424_MOESM2_ESM.pdf [file 13280_2013_424_MOESM2_ESM.pdf]

**Table. S2. Survey point locations (projection WGS 1984 UTM Zone 48N), landscape hydrological indicators, and human use status, and plant species present.**

| Survey Location code | Coordinates             | Habitat type      | Average annual flood duration (days) | Flood frequency 1986-2010 (fraction) | Deforestation evidence (presence /absence) | Fire evidence (presence /absence) | Cattle grazing (presence /absence) | Plant species present                                                                                                                                                                                                                                                                                                                                                                                                  |
|----------------------|-------------------------|-------------------|--------------------------------------|--------------------------------------|--------------------------------------------|-----------------------------------|------------------------------------|------------------------------------------------------------------------------------------------------------------------------------------------------------------------------------------------------------------------------------------------------------------------------------------------------------------------------------------------------------------------------------------------------------------------|
| KP LAKE SED          | N12.58766<br>E104.20005 | open water        | 304                                  | 1.00                                 | NA                                         | NA                                | NA                                 | NA                                                                                                                                                                                                                                                                                                                                                                                                                     |
| KPT1P1               | N12.58587<br>E104.19703 | open forest       | 232                                  | 1.00                                 | 1                                          | 0                                 | 1                                  | <i>Barringtonia acutangula</i> , <i>Brachiaria mutica</i> , <i>Cyperus cyperoides</i> , <i>Scirpus ternatanus</i> , <i>Vitex holoadenon</i>                                                                                                                                                                                                                                                                            |
| KPT1P10              | N12.53609<br>E104.16070 | wet season rice   | 0                                    | 0.00                                 | 1                                          | 1                                 | 1                                  | <i>Oryza sativa</i>                                                                                                                                                                                                                                                                                                                                                                                                    |
| KPT1P2               | N12.58294<br>E104.19462 | closed forest     | 207                                  | 1.00                                 | 0                                          | 0                                 | 0                                  | <i>Acacia caesia</i> , <i>Barringtonia acutangula</i> , <i>Combretum trifoliatum</i> , <i>Crateca adansani</i> , <i>Derris elliptica</i> , <i>Ficus heterophylla</i> , <i>Mimosa pigra</i> , <i>Morinda persicaefolia</i> , <i>Passiflora foetida</i> , unknown_22 Gramineae, <i>Vitex holoadenon</i>                                                                                                                  |
| KPT1P3               | N12.57683<br>E104.19034 | flooded shrubland | 180                                  | 1.00                                 | 1                                          | 0                                 | 0                                  | <i>Antidesma ghaesembilla</i> , <i>Ardisia rigida</i> , <i>Barringtonia acutangula</i> , <i>Combretum trifoliatum</i> , <i>Cratoxylum cochinchimense</i> , <i>Croton caudatus</i> , <i>Dalbergia horrida</i> , <i>Derris elliptica</i> , <i>Morinda persicaefolia</i> , <i>Terminalia cambodiana</i> , unk_15, <i>Vitex holoadenon</i>                                                                                 |
| KPT1P4               | N12.57110<br>E104.18612 | flooded shrubland | 154                                  | 1.00                                 | 0                                          | 0                                 | 0                                  | <i>Ardisia rigida</i> , <i>Croton caudatus</i> , <i>Dalbergia horrida</i> , <i>Derris elliptica</i> , <i>Gmelina asiatica</i> , <i>Hymenocardia wallichii</i> , <i>Morinda persicaefolia</i> , <i>Parameria loevigata</i> , <i>Rotula aquatica</i> , <i>Terminalia cambodiana</i> , unk_15, unknown_9 Fabaceae-papilionoideae                                                                                          |
| KPT1P5               | N12.56505<br>E104.18168 | tall shrubland    | 114                                  | 1.00                                 | 0                                          | 0                                 | 0                                  | <i>Ardisia rigida</i> , <i>Cratoxylum cochinchimense</i> , <i>Croton caudatus</i> , <i>Dalbergia horrida</i> , <i>Derris elliptica</i> , <i>Gmelina asiatica</i> , <i>Hymenocardia wallichii</i> , <i>Morinda persicaefolia</i> , <i>Parameria loevigata</i> , <i>Paspalum commersonii</i> , <i>Quisqualis indica</i> , <i>Rotula aquatica</i> , <i>Terminalia cambodiana</i> , unk_15, unknown_8 Fabaceae-Mimosoideae |

|         |                         |                       |     |      |   |   |   |                                                                                                                                                                                                                                                                                |
|---------|-------------------------|-----------------------|-----|------|---|---|---|--------------------------------------------------------------------------------------------------------------------------------------------------------------------------------------------------------------------------------------------------------------------------------|
| KPT1P6  | N12.55948<br>E104.17751 | floating<br>rice      | 90  | 0.96 | 1 | 1 | 0 | <i>Aeschynomene indica</i> , <i>Fimbristylis argentea</i> , <i>Gmelina asiatica</i> , <i>Hymenocardia wallichii</i> , <i>Oldenlandia praecox</i> , <i>Oryza sativa</i> , unk_15, unknown_24 Gramineae, unknown_25 Labialeae                                                    |
| KPT1P7  | N12.55365<br>E104.17280 | abandoned<br>field    | 74  | 0.84 | 1 | 0 | 0 | <i>Aeschynomene indica</i> , <i>Calamus salicifolius</i> , <i>Hymenocardia wallichii</i> , <i>Merremia hederacea</i> , <i>Oldenlandia praecox</i> , unk_15                                                                                                                     |
| KPT1P8  | N12.54782<br>E104.16847 | village<br>crop       | 48  | 0.72 | 1 | 1 | 0 | <i>Anacardium occidentale</i> , <i>Borassus flabellifer</i> , <i>Carallia brachiata</i> , <i>Streblus asper</i>                                                                                                                                                                |
| KPT1P9  | N12.54171<br>E104.16427 | wet<br>season<br>rice | 2   | 0.28 | 1 | 1 | 0 | <i>Oryza sativa</i>                                                                                                                                                                                                                                                            |
| KPT2P1  | N12.62113<br>E104.18174 | open<br>forest        | 279 | 1.00 | 0 | 0 | 0 | <i>Alternanthera sessili</i> , <i>Barringtonia acutangula</i> , <i>Brachiaria mutica</i> , <i>Combretum trifoliatum</i> , <i>Croton caudatus</i> , <i>Diospyros cambodiana</i> , <i>Eichhornia crassipes</i> , <i>Ficus heterophylla</i>                                       |
| KPT2P10 | N12.57988<br>E104.14622 | tall<br>shrubland     | 130 | 1.00 | 0 | 0 | 0 | <i>Cratogeomys cochinchinense</i> , <i>Cyperus esculentus</i> , <i>Gardenia angkorensis</i> , <i>Madhuca elliptica</i> , <i>Morinda persicaefolia</i> , <i>Parameria loevigata</i> , <i>Terminalia cambodiana</i> , unk_15                                                     |
| KPT2P2  | N12.61744<br>E104.17928 | closed<br>forest      | 230 | 1.00 | 1 | 1 | 0 | <i>Acacia concinna</i> , <i>Barringtonia acutangula</i> , <i>Cratogeomys cochinchinense</i> , <i>Derris elliptica</i> , <i>Ficus heterophylla</i> , <i>Mallotus anisopodus</i> , <i>Stireia obtusifolia</i> , <i>Vitex holoadenon</i>                                          |
| KPT2P3  | N12.61285<br>E104.17485 | Flooded<br>grassland  | 213 | 1.00 | 0 | 1 | 0 | <i>Alternanthera sessili</i> , <i>Mimosa pigra</i> , unknown_22 Gramineae, <i>Vitex holoadenon</i>                                                                                                                                                                             |
| KPT2P4  | N12.60736<br>E104.17052 | flooded<br>grassland  | 195 | 1.00 | 1 | 1 | 0 | <i>Alternanthera sessili</i> , <i>Anogeissus rivularis</i> , <i>Ardisia rigida</i> , <i>Mimosa pigra</i> , <i>Morinda persicaefolia</i> , <i>Passiflora foetida</i> , unknown_19 Araliaceae, unknown_22 Gramineae, <i>Vitex holoadenon</i>                                     |
| KPT2P5  | N12.60517<br>E104.16222 | tall<br>shrubland     | 182 | 1.00 | 0 | 0 | 0 | <i>Antidesma ghaesembilla</i> , <i>Croton caudatus</i> , <i>Derris elliptica</i> , <i>Hymenocardia wallichii</i> , <i>Lophopetalum wightianum</i> , <i>Morinda persicaefolia</i> , <i>Oxyceras longiflora</i> , <i>Terminalia cambodiana</i> , unk_15, <i>Vitex holoadenon</i> |

|         |                         |                   |     |      |   |   |   |                                                                                                                                                                                                                                                                                                                   |
|---------|-------------------------|-------------------|-----|------|---|---|---|-------------------------------------------------------------------------------------------------------------------------------------------------------------------------------------------------------------------------------------------------------------------------------------------------------------------|
| KPT2P6  | N12.59643<br>E104.16044 | tall<br>shrubland | 162 | 1.00 | 1 | 1 | 0 | <i>Ardisia rigida, Croton caudatus, Derris elliptica, Gmelina asiatica, Hymenocardia wallichii, Morinda persicaefolia, Oxyceras longiflora, Terminalia cambodiana, Vitex holoadenon</i>                                                                                                                           |
| KPT2P7  | N12.59055<br>E104.15596 | tall<br>shrubland | 149 | 1.00 | 1 | 1 | 0 | <i>Croton caudatus, Derris elliptica, Gmelina asiatica, Hymenocardia wallichii, Morinda persicaefolia, Oxyceras longiflora, Parameria loevigata, Rotula aquatica, Terminalia cambodiana, unk_15, Xanthophyllum glaucum</i>                                                                                        |
| KPT2P8  | N12.58579<br>E104.15081 | tall<br>shrubland | 138 | 1.00 | 0 | 0 | 0 | <i>Croton caudatus, Gmelina asiatica, Hymenocardia wallichii, Oxyceras longiflora, Terminalia cambodiana, unk_15, unknown_8 Fabaceae-Mimosideae, Xanthophyllum glaucum</i>                                                                                                                                        |
| KPT2P9  | N12.57988<br>E104.14622 | tall<br>shrubland | 138 | 1.00 | 1 | 0 | 0 | <i>Cratoxylum cochinchinense, Croton caudatus, Derris elliptica, Gmelina asiatica, Hymenocardia wallichii, Madhuca elliptica, Morinda persicaefolia, Morinda tomentosa, Oxyceras longiflora, Schoenoplectus mucronatus, Terminalia cambodiana, unk_15, Phyllanthus reticulatus, unknown_8 Fabaceae-Mimosideae</i> |
| KPT3P1  | N12.64960<br>E104.15170 | open<br>forest    | 251 | 1.00 | 1 | 0 | 1 | <i>Barringtonia acutangula, Combretum trifoliatum, Cyperus esculentus, Eichhornia crassipes</i>                                                                                                                                                                                                                   |
| KPT3P10 | N12.62347<br>E104.09545 | floating<br>rice  | 106 | 0.96 | 1 | 1 | 0 | <i>Mimosa pigra, Oryza sativa</i>                                                                                                                                                                                                                                                                                 |
| KPT3P2  | N12.64829<br>E104.14861 | open<br>forest    | 223 | 1.00 | 1 | 1 | 1 | <i>Barringtonia acutangula, Brachiaria mutica, Diospyros cambodiana, Mimosa pigra, Morinda persicaefolia</i>                                                                                                                                                                                                      |
| KPT3P3  | N12.64536<br>E104.14219 | closed<br>forest  | 195 | 1.00 | 1 | 1 | 0 | <i>Barringtonia acutangula, Vitex holoadenon</i>                                                                                                                                                                                                                                                                  |
| KPT3P4  | N12.64116<br>E104.13558 | closed<br>forest  | 170 | 1.00 | 0 | 0 | 0 | <i>Barringtonia acutangula, Combretum trifoliatum, Croton caudatus, Cynometra ramiflora, Morinda persicaefolia, Vitex holoadenon</i>                                                                                                                                                                              |
| KPT3P5  | N12.63842<br>E104.12895 | closed<br>forest  | 159 | 1.00 | 1 | 1 | 0 | <i>Acacia concinna, Anogeissus rivularis, Mimosa pigra, Morinda persicaefolia, Vitex holoadenon</i>                                                                                                                                                                                                               |
| KPT3P6  | N12.63110<br>E104.12859 | open<br>forest    | 158 | 1.00 | 1 | 1 | 0 | <i>Mimosa pigra</i>                                                                                                                                                                                                                                                                                               |

|         |                         |                      |     |      |   |   |   |                                                                                                                                                                                              |
|---------|-------------------------|----------------------|-----|------|---|---|---|----------------------------------------------------------------------------------------------------------------------------------------------------------------------------------------------|
| KPT3P7  | N12.62714<br>E104.12173 | flooded<br>shrubland | 144 | 1.00 | 0 | 0 | 0 | <i>Antidesma ghaesembilla, Ardisia rigida, Croton caudatus, Cynometra ramiflora, Derris elliptica, Hymenocardia wallichii, Madhuca elliptica, Morinda persicaefolia, Oxyceras longiflora</i> |
| KPT3P8  | N12.62988<br>E104.10799 | flooded<br>shrubland | 136 | 1.00 | 1 | 0 | 0 | <i>Cynometra ramiflora, Dalbergia horrida, Hymenocardia wallichii, Oxyceras longiflora, Terminalia cambodiana</i>                                                                            |
| KPT3P9  | N12.62664<br>E104.10208 | floating<br>rice     | 136 | 1.00 | 1 | 1 | 0 | <i>Oryza sativa</i>                                                                                                                                                                          |
| PTT1P1  | N13.18373<br>E103.70146 | grassland            | 273 | 1.00 | 0 | 0 | 0 | <i>Aeschynomene indica, Brachiaria mutica, Cyperus dubius, Fimbristylis gracilentia, Oryza rufipagon, Sphenoclea zeylanica, unknown_23 Gramineae</i>                                         |
| PTT1P10 | N13.16724<br>E103.56785 | flooded<br>shrubland | 214 | 1.00 | 1 | 0 | 0 | <i>Barringtonia acutangula, Combretum trifoliatum, Cratoxylum cochinchimense, Croton caudatus, Ficus heterophylla, Hymenocardia wallichii, Morinda persicaefolia, Vitex holoadenon</i>       |
| PTT1P2  | N13.18321<br>E103.69966 | open<br>forest       | 270 | 1.00 | 1 | 0 | 0 | <i>Barringtonia acutangula, Brachiaria mutica, Combretum trifoliatum, Merremia hederacea, Oryza rufipagon</i>                                                                                |
| PTT1P3  | N13.19319<br>E103.67986 | closed<br>forest     | 261 | 1.00 | 0 | 0 | 0 | <i>Acacia concinna, Cratoxylum cochinchimense, Ficus heterophylla, Vitex holoadenon</i>                                                                                                      |
| PTT1P4  | N13.19428<br>E103.66928 | closed<br>forest     | 253 | 1.00 | 0 | 0 | 0 | <i>Cratoxylum cochinchimense, Ficus heterophylla, Morinda persicaefolia, Vitex holoadenon</i>                                                                                                |
| PTT1P5  | N13.18972<br>E103.66265 | closed<br>forest     | 241 | 1.00 | 1 | 0 | 0 | <i>Cratoxylum cochinchimense, Ficus heterophylla, Vitex holoadenon</i>                                                                                                                       |
| PTT1P6  | N13.18554<br>E103.65720 | closed<br>forest     | 232 | 1.00 | 1 | 0 | 0 | <i>Cratoxylum cochinchimense, Ficus heterophylla, Morinda persicaefolia, Vitex holoadenon</i>                                                                                                |
| PTT1P7  | N13.17993<br>E103.65263 | closed<br>forest     | 230 | 1.00 | 1 | 0 | 0 | <i>Barringtonia acutangula, Cratoxylum cochinchimense, Vitex holoadenon</i>                                                                                                                  |
| PTT1P8  | N13.18207<br>E103.60414 | closed<br>forest     | 225 | 1.00 | 0 | 0 | 0 | <i>Cratoxylum cochinchimense, Derris elliptica, Ficus heterophylla, Vitex holoadenon</i>                                                                                                     |
| PTT2P1  | N13.25855<br>E103.71791 | grassland            | 304 | 1.00 | 0 | 0 | 0 | <i>Scirpus ternatanus</i>                                                                                                                                                                    |

|         |                         |                         |            |      |   |   |   |                                                                                                                                                                                            |
|---------|-------------------------|-------------------------|------------|------|---|---|---|--------------------------------------------------------------------------------------------------------------------------------------------------------------------------------------------|
| PTT2P10 | N13.33601<br>E103.74150 | receding<br>rice        | 127        | 1.00 | 1 | 1 | 0 | <i>Actinoscirpus grossus, Barringtonia acutangula, Cyperus tenuiculmis, Fuirema ciliaris, Lindernia crustaceae, Ludwigia adscendens, Mazus japonicus, Oryza sativa, Scirpus ternatanus</i> |
| PTT2P2  | N13.26172<br>E103.71764 | open<br>forest          | 292        | 1.00 | 0 | 0 | 0 | <i>Barringtonia acutangula, Eichhornia crassipes</i>                                                                                                                                       |
| PTT2P3  | N13.27323<br>E103.71310 | closed<br>forest        | 230        | 1.00 | 0 | 0 | 0 | <i>Barringtonia acutangula, Ficus heterophylla, Ipomoea aquatica, Morinda persicaefolia, Vitex holoadenon</i>                                                                              |
| PTT2P4  | N13.28122<br>E103.71427 | closed<br>forest        | 199        | 1.00 | 1 | 1 | 0 | <i>Cratoxylum cochinchimense, Ficus heterophylla, Vitex holoadenon</i>                                                                                                                     |
| PTT2P7  | N13.29904<br>E103.73356 | closed<br>forest        | 141        | 1.00 | 1 | 1 | 1 | <i>Alternanthera sessili, Barringtonia acutangula, Brachiaria mutica, Combretum trifoliatum, Ludwigia adscendens, Morinda persicaefolia, Polygonum barbatum, Vitex holoadenon</i>          |
| PTT2P8  | N13.30810<br>E103.73630 | flooded<br>shrubland    | 153        | 1.00 | 1 | 1 | 0 | <i>Barringtonia acutangula, Croton caudatus, Derris elliptica, Gmelina asiatica, Hymenocardia wallichii, Morinda persicaefolia, unk_15</i>                                                 |
| PTT2P9  | N13.31462<br>E103.73960 | receding<br>rice fields | 146        | 1.00 | 1 | 1 | 0 | <i>Actinoscirpus grossus, Brachiaria mutica, Cyperus tenuiculmis, Fuirema ciliaris, Mazus japonicus, Oldenlandia praecox, Oryza sativa, Schoenoplectus mucronatus</i>                      |
| SST1P1  | N12.51019<br>E104.48372 | closed<br>forest        | 329        | 1.00 | 0 | 0 | 0 | <i>Crateva religiosa, Croton caudatus, Ficus heterophylla, Mallotus anisopodus, Quisqualis indica, Vitex holoadenon</i>                                                                    |
| SST1P10 | N12.46042<br>E104.44674 | Village<br>crop         | 0          | 0.04 | 1 | 1 | 0 | <i>Citrus reticulata, Cocos nucifera, Dendrocalamus asper, Psidium guajava</i>                                                                                                             |
| SST1P2  | N12.50739<br>E104.48124 | closed<br>forest        | 228        | 1.00 | 1 | 0 | 0 | <i>Barringtonia acutangula, Combretum trifoliatum, Croton caudatus, Mimosa pigra, Morinda persicaefolia, Vitex holoadenon</i>                                                              |
| SST1P3  | N12.50143<br>E104.47682 | closed<br>forest        | 188        | 1.00 | 1 | 1 | 0 | <i>Barringtonia acutangula, Brachiaria mutica, Combretum trifoliatum, Cratoxylum cochinchimense, Diospyros cambodiana, Mimosa pigra, Morinda persicaefolia, Vitex holoadenon</i>           |
| SST1P4  | N12.49585<br>E104.47293 | flooded<br>shrubland    | <b>160</b> | 1.00 | 1 | 1 | 0 | <i>Barringtonia acutangula, Cratoxylum cochinchimense, Derris elliptica, Hymenocardia wallichii, Morinda persicaefolia, Parameria loevigata, Vitex holoadenon</i>                          |

|         |                         |                       |     |      |   |   |   |                                                                                                                                                                                   |
|---------|-------------------------|-----------------------|-----|------|---|---|---|-----------------------------------------------------------------------------------------------------------------------------------------------------------------------------------|
| SST1P5  | N12.48966<br>E104.46839 | tall<br>shubland      | 131 | 1.00 | 1 | 0 | 0 | <i>Acacia spp, Cratoxylum pruniflorum, Croton caudatus, Derris elliptica, Gmelina asiatica, Hymenocardia wallichii, Parameria loevigata, unk_15, Vetiveria giganioides</i>        |
| SST1P6  | N12.48377<br>E104.46389 | abandoned<br>field    | 88  | 0.96 | 0 | 0 | 0 | <i>Cynodon dactylon, Parameria loevigata, unk_15</i>                                                                                                                              |
| SST1P7  | N12.47807<br>E104.45967 | abandoned<br>field    | 47  | 0.72 | 1 | 0 | 0 | <i>Cynodon dactylon</i>                                                                                                                                                           |
| SST1P8  | N12.47210<br>E104.45527 | wet<br>season<br>rice | 36  | 0.64 | 1 | 1 | 0 | <i>Oryza sativa</i>                                                                                                                                                               |
| SST1P9  | N12.46612<br>E104.45096 | wet<br>season<br>rice | 0   | 0.20 | 1 | 1 | 0 | <i>Oryza sativa, unknown_20 Gramineae</i>                                                                                                                                         |
| SST2P1  | N12.52630<br>E104.48107 | aquatic<br>grassland  | 304 | 1.00 | 1 | 0 | 1 | <i>Barringtonia acutangula, Brachiaria mutica</i>                                                                                                                                 |
| SST2P10 | N12.57123<br>E104.52381 | flooded<br>grassland  | 217 | 1.00 | 1 | 0 | 0 | <i>Barringtonia acutangula, Cyperus esculentus, Ipomoea aquatica, Ludwigia adscendens, Ludwigia hyssiopifolia, Polygonum barbatum, unknown_22 Gramineae</i>                       |
| SST2P2  | N12.52878<br>E104.48350 | closed<br>forest      | 279 | 1.00 | 1 | 0 | 0 | <i>Barringtonia acutangula, Combretum trifoliatum, Dalbergia horrida, Derris alborubra, Morinda persicaefolia</i>                                                                 |
| SST2P3  | N12.54173<br>E104.48573 | closed<br>forest      | 187 | 1.00 | 1 | 0 | 0 | <i>Barringtonia acutangula, Combretum trifoliatum, Derris alborubra, Ficus heterophylla, Ichnocarpus oxypetalus, Mallotus anisopodus, Morinda persicaefolia, Vitex holoadenon</i> |
| SST2P5  | N12.54450<br>E104.49766 | closed<br>forest      | 214 | 1.00 | 1 | 1 | 0 | <i>Barringtonia acutangula, Derris alborubra, Ficus heterophylla, Maclura cochinchimensis, Mallotus anisopodus, Morinda persicaefolia, Vitex holoadenon</i>                       |
| SST2P6  | N12.55012<br>E104.50372 | closed<br>forest      | 214 | 1.00 | 1 | 1 | 0 | <i>Barringtonia acutangula, Combretum trifoliatum, Ficus heterophylla, Garcina cochinchinensis, Lophopetalum wightianum, Morinda persicaefolia, Vitex holoadenon</i>              |
| SST2P7  | N12.55532<br>E104.50866 | closed<br>forest      | 195 | 1.00 | 0 | 0 | 0 | <i>Barringtonia acutangula, Combretum trifoliatum, Cratoxylum cochinchimense, Morinda persicaefolia, Parameria loevigata, Terminalia Cambodiana, Vitex holoadenon</i>             |

|        |                         |                      |     |      |    |    |    |                                                                                                                                                                                     |
|--------|-------------------------|----------------------|-----|------|----|----|----|-------------------------------------------------------------------------------------------------------------------------------------------------------------------------------------|
| SST2P8 | N12.56073<br>E104.51382 | flooded<br>grassland | 195 | 1.00 | 0  | 1  | 1  | unknown_22 Gramineae                                                                                                                                                                |
| SST2P9 | N12.56593<br>E104.51898 | open<br>forest       | 217 | 1.00 | 1  | 1  | 0  | <i>Barringtonia acutangula, Eichhornia crassipes</i>                                                                                                                                |
| SST3P1 | N12.59370<br>E104.45117 | open<br>forest       | 228 | 1.00 | 0  | 0  | 0  | <i>Brachiaria mutica, Combretum trifoliatum, sesbania javanica</i>                                                                                                                  |
| SST3P2 | N12.59573<br>E104.45428 | open<br>forest       | 279 | 1.00 | 0  | 0  | 0  | <i>Barringtonia acutangula, Brachiaria mutica, Diospyros cambodiana, Vitex holoadenon</i>                                                                                           |
| SST3P3 | N12.60385<br>E104.45016 | closed<br>forest     | 329 | 1.00 | 0  | 0  | 0  | <i>Diospyros cambodiana, Morinda persicaefolia</i>                                                                                                                                  |
| SST3P4 | N12.60845<br>E104.46466 | closed<br>forest     | 251 | 1.00 | 0  | 0  | 0  | <i>Barringtonia acutangula, Ficus heterophylla, Ipomoea aquatica, Morinda persicaefolia</i>                                                                                         |
| SST3P5 | N12.61083<br>E104.47052 | open<br>forest       | 267 | 1.00 | 1  | 0  | 0  | <i>Barringtonia acutangula, Eichhornia crassipes, Polygonum barbatum, Vitex holoadenon</i>                                                                                          |
| SST3P6 | N12.61481<br>E104.47709 | closed<br>forest     | 214 | 1.00 | 0  | 0  | 0  | <i>Barringtonia acutangula, Combretum trifoliatum, Ficus heterophylla, Vitex holoadenon</i>                                                                                         |
| SST3P7 | N12.62058<br>E104.48133 | closed<br>forest     | 214 | 1.00 | 0  | 0  | 0  | <i>Barringtonia acutangula, Combretum trifoliatum, Mallotus anisopodus, Morinda persicaefolia, Vitex holoadenon</i>                                                                 |
| SST3P8 | N12.62567<br>E104.48683 | grassland            | 217 | 1.00 | 0  | 1  | 1  | <i>Brachiaria mutica, Eichhornia crassipes, Ipomoea aquatica, Polygonum barbatum, Vetiveria giganioides</i>                                                                         |
| SST3P9 | N12.62856<br>E104.49137 | closed<br>forest     | 217 | 1.00 | 0  | 0  | 0  | <i>Barringtonia acutangula, Combretum trifoliatum, Cratoxylum cochinchimense, Croton caudatus, Derris alborubra, Morinda persicaefolia, Terminalia cambodiana, Vitex holoadenon</i> |
| PTWL   | N13.18060<br>E103.71501 | open<br>water        | 365 | 1.00 | NA | NA | NA | NA                                                                                                                                                                                  |
