# Supplementary material
Source: PubMed Central journal article supplement (PMC3790129)
Supplement: 13280_2013_424_MOESM3_ESM.pdf [file 13280_2013_424_MOESM3_ESM.pdf]

**Table. S3. Vegetation parameters at each survey point.**

| Point code  | Litter cover (%) | Ground cover (%) | Under-story cover (%) | Canopy cover (%) | AGB canopy (kg/m <sup>2</sup> ) | AGB shrubs (kg/m <sup>2</sup> ) | AGB herbs (kg/m <sup>2</sup> ) | Canopy height (m) |
|-------------|------------------|------------------|-----------------------|------------------|---------------------------------|---------------------------------|--------------------------------|-------------------|
| KP LAKE SED | 0                | 0                | 0                     | 0                | 0                               | 0                               | 0                              | 0                 |
| KPT1P1      | 2                | 87               | 36                    | 22               | 0.96                            | 0.35                            | 0.23                           | 9.9               |
| KPT1P10     | 0.7              | 13               | 0                     | 0                | 0                               | 0                               | 0.03                           | 0.1               |
| KPT1P2      | 28.3             | 52               | 77                    | 60               | 0.88                            | 0.83                            | 0.02                           | 9                 |
| KPT1P3      | 85               | 12               | 71                    | 68               | 0.76                            | 0.91                            | 0                              | 8.6               |
| KPT1P4      | 63.3             | 23               | 73                    | 74               | 0.05                            | 4.2                             | 0                              | 6.5               |
| KPT1P5      | 60               | 30               | 68                    | 73               | 0.06                            | 0.34                            | 0.07                           | 5.7               |
| KPT1P6      | 5.7              | 15               | 4                     | 0                | 0                               | 0                               | 0.1                            | 0.3               |
| KPT1P7      | 6.7              | 47               | 74                    | 0                | 0                               | 0.04                            | 1.03                           | 1.7               |
| KPT1P8      | 0                | 46               | 0                     | 0                | 24.64                           | 0                               | 0.05                           | 9.1               |
| KPT1P9      | 7.7              | 10               | 3                     | 7                | 0                               | 0                               | 0.08                           | 0.1               |
| KPT2P1      | 8.3              | 20               | 70                    | 19               | 0.01                            | 2.04                            | 0.03                           | 3.6               |
| KPT2P10     | 15.7             | 38               | 64                    | 27               | 0.05                            | 0.66                            | 0.1                            | 4.6               |
| KPT2P2      | 81.7             | 15               | 85                    | 90               | 5.03                            | 0.94                            | 0                              | 15.4              |
| KPT2P3      | 17               | 33               | 75                    | 28               | 0                               | 0.81                            | 0.06                           | 2.5               |
| KPT2P4      | 18.3             | 27               | 52                    | 14               | 0.01                            | 1.07                            | 0.03                           | 3.6               |
| KPT2P5      | 63.3             | 23               | 83                    | 65               | 1.05                            | 1.12                            | 0                              | 12.5              |
| KPT2P6      | 50               | 20               | 84                    | 59               | 0.17                            | 1.43                            | 0                              | 7.8               |
| KPT2P7      | 81.7             | 14               | 68                    | 55               | 0.31                            | 2.18                            | 0                              | 7.9               |
| KPT2P8      | 63.3             | 15               | 61                    | 61               | 0.11                            | 0.46                            | 0                              | 5                 |
| KPT2P9      | 65               | 15               | 77                    | 51               | 0.04                            | 2.91                            | 0                              | 4.9               |
| KPT3P1      | 2.3              | 10               | 12                    | 9                | 0.48                            | 0.01                            | 0.03                           | 6.5               |
| KPT3P10     | 3.3              | 1                | 1                     | 0                | 0                               | 0.01                            | 0.03                           | 0.7               |
| KPT3P2      | 0                | 80               | 2                     | 0                | 0                               | 0.02                            | 0.1                            | 0.6               |
| KPT3P3      | 40               | 13               | 86                    | 27               | 0.22                            | 0.81                            | 0                              | 7.9               |
| KPT3P4      | 30               | 13               | 90                    | 61               | 0.25                            | 1.27                            | 0                              | 10.5              |
| KPT3P5      | 10               | 17               | 84                    | 38               | 0                               | 2.11                            | 0                              | 4                 |
| KPT3P6      | 28.3             | 18               | 62                    | 34               | 0                               | 0.03                            | 0                              | 2.7               |
| KPT3P7      | 80               | 13               | 86                    | 81               | 0.07                            | 1.45                            | 0                              | 6.9               |
| KPT3P8      | 80               | 10               | 72                    | 79               | 0.25                            | 1.31                            | 0                              | 7.1               |
| KPT3P9      | 1.7              | 0                | 0                     | 0                | 0                               | 0                               | 0.02                           | 0                 |
| PTT1P1      | 2                | 63               | 51                    | 0                | 0                               | 0                               | 0.39                           | 1                 |
| PTT1P10     | 56.7             | 23               | 76                    | 67               | 0.05                            | 0.65                            | 0                              | 6.5               |
| PTT1P2      | 11.7             | 20               | 58                    | 75               | 1.12                            | 0.01                            | 0.02                           | 6.6               |
| PTT1P3      | 48.3             | 30               | 64                    | 62               | 0                               | 0.48                            | 0                              | 4.4               |
| PTT1P4      | 27.5             | 40               | 76                    | 33               | 0                               | 0.2                             | 0                              | 2.2               |
| PTT1P5      | 65               | 18               | 86                    | 71               | 0                               | 0.52                            | 0                              | 4.3               |
| PTT1P6      | 65               | 22               | 65                    | 58               | 0                               | 0.19                            | 0                              | 3.4               |
| PTT1P7      | 60               | 28               | 68                    | 76               | 0                               | 1.34                            | 0                              | 3.9               |
| PTT1P8      | 51.7             | 17               | 72                    | 65               | 0                               | 0.48                            | 0                              | 4.3               |
| PTT2P1      | 5                | 72               | 80                    | 12               | 0                               | 0                               | 1.03                           | 1.8               |
| PTT2P10     | 4.3              | 55               | 29                    | 0                | 0.29                            | 0.08                            | 0.48                           | 6.2               |
| PTT2P2      | 40               | 37               | 59                    | 63               | 3.57                            | 0                               | 0.42                           | 11.6              |
| PTT2P3      | 63.3             | 33               | 67                    | 58               | 9.48                            | 0.09                            | 0.07                           | 13                |
| PTT2P4      | 28.3             | 43               | 82                    | 80               | 0                               | 0.26                            | 0                              | 3.6               |
| PTT2P7      | 6.7              | 67               | 42                    | 32               | 0.18                            | 1.2                             | 0.29                           | 4.8               |
| PTT2P8      | 80               | 13               | 71                    | 61               | 0.1                             | 4.04                            | 0                              | 5.2               |
| PTT2P9      | 15               | 57               | 27                    | 0                | 0                               | 0                               | 0.66                           | 0.5               |
| SST1P1      | 40               | 20               | 88                    | 33               | 0.4                             | 1.18                            | 0                              | 10                |

|         |      |    |    |    |      |      |      |      |
|---------|------|----|----|----|------|------|------|------|
| SST1P10 | 0    | 0  | 0  | 74 | 4.73 | 0    | 0    | 18   |
| SST1P2  | 33.3 | 12 | 76 | 43 | 0.3  | 0.39 | 0.01 | 8.8  |
| SST1P3  | 41.7 | 8  | 34 | 30 | 0.06 | 0.11 | 0.02 | 8.7  |
| SST1P4  | 90   | 10 | 92 | 67 | 0.02 | 6.48 | 0    | 5.3  |
| SST1P5  | 78.3 | 22 | 76 | 57 | 0.03 | 5.17 | 0.05 | 5.4  |
| SST1P6  | 0    | 12 | 6  | 0  | 0    | 0.18 | 0.04 | 1.7  |
| SST1P7  | 0    | 25 | 0  | 0  | 0    | 0    | 0.02 | 0.1  |
| SST1P8  | 28.3 | 0  | 0  | 0  | 0    | 0    | 0.25 | 0    |
| SST1P9  | 26.7 | 2  | 0  | 0  | 0    | 0    | 0.03 | 0.1  |
| SST2P1  | 0    | 77 | 43 | 0  | 0    | 0.48 | 0.65 | 2.5  |
| SST2P10 | 35   | 53 | 59 | 20 | 0.35 | 0    | 0.55 | 10.7 |
| SST2P2  | 33.3 | 8  | 83 | 87 | 2.35 | 0.18 | 0    | 10.3 |
| SST2P3  | 76.7 | 17 | 88 | 80 | 2.89 | 0.95 | 0    | 16.5 |
| SST2P5  | 73.3 | 15 | 83 | 67 | 4.08 | 1.1  | 0    | 17.4 |
| SST2P6  | 75   | 19 | 84 | 82 | 2.7  | 0.4  | 0    | 15.1 |
| SST2P7  | 65   | 33 | 86 | 74 | 1.29 | 0.41 | 0    | 10.8 |
| SST2P8  | 10   | 15 | 88 | 22 | 0    | 0    | 0.33 | 2.7  |
| SST2P9  | 43.3 | 10 | 50 | 4  | 1.02 | 0    | 0.31 | 11   |
| SST3P1  | 0    | 70 | 50 | 1  | 0    | 0.51 | 0.57 | 1.9  |
| SST3P2  | 0    | 33 | 40 | 0  | 0    | 1.32 | 0.18 | 3    |
| SST3P3  | -    | 17 | 93 | 75 | 10.3 | 2.55 | 0    | 20   |
| SST3P4  | 55   | 8  | 37 | 92 | 2.06 | 0.18 | 0    | 12.4 |
| SST3P5  | 0    | 33 | 66 | 5  | 0.05 | 0.31 | 0.27 | 5.2  |
| SST3P6  | -    | 9  | 88 | 82 | 0.11 | 4.29 | 0    | 6.8  |
| SST3P7  | 90   | 12 | 89 | 77 | 1.13 | 0.69 | 0    | 11.1 |
| SST3P8  | 0    | 70 | 7  | 0  | 0    | 0    | 0.32 | 0.5  |
| SST3P9  | -    | 40 | 94 | 72 | 0.88 | 2.71 | 0    | 13.7 |
| PTWL    | 0    | 0  | 0  | 0  | 0    | 0    | 0    | 0    |
