# Supplementary material
Source: PubMed Central journal article supplement (PMC3790129)
Supplement: 13280_2013_424_MOESM4_ESM.pdf [file 13280_2013_424_MOESM4_ESM.pdf]

**Table. S4. Soil parameters at each survey point.**

| Point code  | Organic layer depth (cm) | A-horizon depth (cm) | Mottles abundance (%) | Organic matter content (%) | Soil moisture (%) | N (mg/kg) | K (mg/kg) | pH   | Wet soil color          | Clay (%) | Silt (%) | Sand (%) | plant available water (m <sup>3</sup> water/m <sup>3</sup> soil) | Electrical conductivity (µs/m <sup>2</sup> ) |
|-------------|--------------------------|----------------------|-----------------------|----------------------------|-------------------|-----------|-----------|------|-------------------------|----------|----------|----------|------------------------------------------------------------------|----------------------------------------------|
| KP LAKE SED |                          |                      |                       | 1.7                        | 48                | 7.5       | 12.4      | 6.12 | Yellowish brown         | 30       | 10       | 60       | 0.09                                                             | 80.4                                         |
| KPT1P1      | 0                        | 17                   | 10                    | 8.8                        | 21.1              | 7.5       | 12.4      | 5.23 | Brown                   | 37.5     | 12.5     | 50       | 0.1                                                              | 161.2                                        |
| KPT1P10     | 0                        | 30                   | 0                     | 0.9                        | 5.2               | 7         | 24.9      | 5.68 | Brown                   | 15       | 17.5     | 67.5     | 0.1                                                              | 16.6                                         |
| KPT1P2      | 6                        | 13                   | 20                    | 4.5                        | 13.3              | 7.5       | 12.4      | 4.43 | Dark gray               | 42.5     | 15       | 42.5     | 0.11                                                             | 199.1                                        |
| KPT1P3      | 6                        | 10                   | 30                    | 7                          | 19                | 7         | 12.4      | 4.13 | Very dark grayish brown | 37.5     | 10       | 52.5     | 0.1                                                              | 116.4                                        |
| KPT1P4      | 0                        | 13                   | 0                     | 2.6                        | 11                | 7.5       | 29        | 5.25 | Brown                   | 22.5     | 15       | 62.5     | 0.1                                                              | 63.1                                         |
| KPT1P5      | 0.5                      | 23.5                 | 10                    | 9.4                        | 5.5               | 7.5       | 45.6      | 4.71 | Brown                   | 12.5     | 25       | 62.5     | 0.11                                                             | 62.6                                         |
| KPT1P6      | 0                        | 16                   | 0                     | 2.3                        | 9.6               | 7.5       | 12.4      | 4.98 | Brown                   | 16.25    | 21.25    | 62.5     | 0.1                                                              | 71.6                                         |
| KPT1P7      | 0                        | 14                   | 15                    | 1.7                        | 6.1               | 7.5       | 12.4      | 5.11 | Brown                   | 20       | 35       | 45       | 0.13                                                             | 41.6                                         |
| KPT1P8      | 0                        | 20                   | 0                     | 0.4                        | 4.7               | 7.5       | 24.9      | 6.02 | Brown                   | 5        | 15       | 80       | 0.09                                                             | 33.2                                         |
| KPT1P9      | 0                        | 19                   | 0                     | 0.9                        | 4.5               | 7         | 24.9      | 5.99 | Brown                   | 7.5      | 12.5     | 80       | 0.09                                                             | 42.7                                         |
| KPT2P1      | 0                        | 9                    | 0                     | 5.9                        | 26.2              | 7         | 18.7      | 6.43 | Brown                   | 45       | 12.5     | 42.5     | 0.11                                                             | 365                                          |
| KPT2P10     | 1                        | 22                   | 0                     | 8.3                        | 9.8               | 7         | 12.4      | 4.56 | Brown                   | 33.75    | 43.75    | 22.5     | 0.16                                                             | 36                                           |
| KPT2P2      | 3.5                      | 12.5                 | 30                    | 7.3                        | 24.9              | 7         | 18.7      | 4.75 | Brown                   | 48.75    | 17.5     | 33.75    | 0.12                                                             | 280                                          |
| KPT2P3      | 2                        | 9                    | 34                    | 9.3                        | 18.3              | 7         | 15.6      | 4.33 | Grayish brown           | 61.25    | 8.75     | 30       | 0.11                                                             | 253                                          |
| KPT2P4      | 1                        | 6                    | 10                    | 3.8                        | 12.9              | 7         | 12.4      | 4.05 | Very dark gray          | 37.5     | 7.5      | 55       | 0.09                                                             | 193                                          |
| KPT2P5      | 3                        | 10                   | 50                    | 7.3                        | 17.7              | 7         | 39.4      | 4.22 | Dark grayish brown      | 40       | 13.75    | 46.25    | 0.11                                                             | 157                                          |
| KPT2P6      | 0                        | 17                   | 28                    | 8.1                        | 26.8              | 7         | 66.4      | 4.8  | Dark grayish brown      | 33.75    | 20       | 46.25    | 0.11                                                             | 119                                          |
| KPT2P7      | 3                        | 15                   | 25                    | 6.4                        | 15.7              | 7         | 66.4      | 4.11 | brown                   | 38.75    | 31.25    | 30       | 0.14                                                             | 86                                           |
| KPT2P8      | 2                        | 11                   | 0                     | 12                         | 12.3              | 7         | 66.4      | 3.99 | brown                   | 27.5     | 25       | 47.5     | 0.12                                                             | 65                                           |
| KPT2P9      | 2                        | 14                   | 40                    | 10.7                       | 24.6              | 7         | 66.4      | 3.94 | Dark grayish brown      | 28.75    | 35       | 36.25    | 0.14                                                             | 52                                           |
| KPT3P1      | 0                        | 26                   | 0                     | 21.8                       | 33.9              | 7.5       | 12.4      | 5.3  | Dark                    | 32.5     | 15       | 52.5     | 0.1                                                              | 180                                          |

|         |     |      |      |      |      |     |      |             |                    |       |       |       |      |       |
|---------|-----|------|------|------|------|-----|------|-------------|--------------------|-------|-------|-------|------|-------|
|         |     |      |      |      |      |     |      |             | yellowish brown    |       |       |       |      |       |
| KPT3P10 | 0   | 17   | 30   | 10   | 22.6 | 7   | 24.9 | 4.49        | Dark grayish brown | 52.5  | 13.75 | 33.75 | 0.12 | 145   |
| KPT3P2  | 0   | 22   | 20   | 9.9  | 23.6 | 7.5 | 12.4 | 4.37        | Brown              | 57.5  | 15    | 27.5  | 0.12 | 233   |
| KPT3P3  | 2.5 | 18.5 | 57.8 | 10.6 | 18.6 | 7.5 | 12.4 | 4.41        | Grayish brown      | 52.5  | 5     | 42.5  | 0.1  | 165   |
| KPT3P4  | 5   | 8    | 30   | 11.6 | 17.9 | 7.5 | 12.4 | 4.46        | Dark grayish brown | 45    | 5     | 50    | 0.09 | 113   |
| KPT3P5  | 1   | 11   | 20   | 10   | 19.1 | 7   | 12.4 | 4.67        | Brown              | 42.5  | 12.5  | 45    | 0.11 | 83    |
| KPT3P6  | 1   | 9    | 15   | 11.1 | 16.5 | 7.5 | 12.4 | 4.82        | Brown              | 37.5  | 17.5  | 45    | 0.12 | 81    |
| KPT3P7  | 4   | 16   | 20   | 8.7  | 14.4 | 7.5 | 12.4 | 4.19        | Brown              | 40    | 22.5  | 37.5  | 0.12 | 71    |
| KPT3P8  | 2   | 6    | 30   | 13.9 | 14.1 | 7   | 24.9 | <b>4.38</b> | Brown              | 33.75 | 13.75 | 52.5  | 0.1  | 108   |
| KPT3P9  | 0   | 13   | 20   | 4.3  | 10.7 | 7   | 24.9 | 4.53        | Brown              | 41.25 | 13.75 | 45    | 0.11 | 146   |
| PTT1P1  | 0   | 22   | 10   | 15   | 44   | 7.5 | 24.9 | 7.06        | Brown              | 45    | 21.25 | 33.75 | 0.12 | 535   |
| PTT1P10 | 9   | 5    | 20   | 13.8 | 20.3 | 7.5 | 12.4 | 4.45        | Brown              | 55    | 5     | 40    | 0.1  | 288   |
| PTT1P2  | 3   | 33   | 30   | 13.2 | 21.4 | 7.5 | 24.9 | 6.01        | Brown              | 52.5  | 16.25 | 31.25 | 0.12 | 365   |
| PTT1P3  | 2   | 13   | 40   | 17.6 | 22.9 | 7.5 | 24.9 | 6           | Brown              | 65    | 10    | 25    | 0.12 | 230   |
| PTT1P4  | 3   | 11   | 20   | 12.8 | 33   | 7.5 | 24.9 | 4.86        | Brown              | 70    | 8.75  | 21.25 | 0.13 | 317   |
| PTT1P5  | 3   | 9    | 40   | 12.8 | 28.3 | 7.5 | 24.9 | 4.73        | Brown              | 70    | 7.5   | 22.5  | 0.13 | 383   |
| PTT1P6  | 3.5 | 14.5 | 40   | 13.8 | 24.6 | 7.5 | 18.7 | 4.81        | Brown              | 62.5  | 10    | 27.5  | 0.12 | 431   |
| PTT1P7  | 3.5 | 17   | 30   | 14.1 | 23.6 | 7.5 | 12.4 | 5.28        | Brown              | 62.5  | 5     | 32.5  | 0.11 | 291   |
| PTT1P8  | 3   | 11   | 33.3 | 15.4 | 19.5 | 7.5 | 12.4 | 4.01        | Yellowish brown    | 63.75 | 6.25  | 30    | 0.11 | 252   |
| PTT2P1  | 3   | 8    | 80   |      | 23   | 7.5 | 24.9 | 6.96        | Brown              | 37.5  | 20    | 42.5  | 0.12 | 335   |
| PTT2P10 | 0.7 | 16.3 | 10   | 2.5  | 26.5 | 7   | 12.4 | 4.56        | Brown              | 21.25 | 13.75 | 65    | 0.09 | 65    |
| PTT2P2  | 2   | 11   | 50   | 8.3  | 35   | 7.5 | 45.6 | 4.16        | Brown              | 42.5  | 15    | 42.5  | 0.11 | 369   |
| PTT2P3  | 6   | 12   | 50   | 7.7  | 29.3 | 7.5 | 12.4 | 4.73        | Brown              | 60    | 11.25 | 28.75 | 0.12 | 450   |
| PTT2P4  | 3   | 10   | 30   | 9.5  | 28.3 | 7.5 | 45.6 | 4.11        | Brown              | 62.5  | 12.5  | 25    | 0.12 | 340   |
| PTT2P7  | 3   | 10   | 30   | 12.1 | 28.1 | 7.5 | 12.4 | 4.32        | Dark grayish brown | 45    | 15    | 40    | 0.11 | 242   |
| PTT2P8  | 2   | 11   | 25   | 9.3  | 23.1 | 7   | 12.4 | 4.21        | Brown              | 46.25 | 8.75  | 45    | 0.1  | 133   |
| PTT2P9  | 3   | 13   | 20   | 9.3  | 25.6 | 7.5 | 18.7 | 4.02        | Very dark gray     | 40    | 12.5  | 47.5  | 0.1  | 185   |
| SST1P1  | 0   | 24   | 20   | 7.1  | 16.4 | 7   | 45.6 | 5.13        | Brown              | 40    | 45    | 15    | 0.16 | 443   |
| SST1P10 | 0   | 16   | 0    | 4.1  | 4.3  | 30  | 83   | 6.16        | Black              | 5     | 15    | 80    | 0.09 |       |
| SST1P2  | 0   | 12   | 40   | 7    | 12.8 | 7   | 83   | 4.91        | Brown              | 50    | 32.5  | 17.5  | 0.15 | 646.5 |
| SST1P3  | 3   | 12   | 30   | 9.7  | 20.8 | 7.5 | 45.6 | 4.9         | Light              | 62.5  | 10    | 27.5  | 0.12 | 396   |

|         |     |     |    |      |      |      |      |      |                            |       |       |       |      |       |
|---------|-----|-----|----|------|------|------|------|------|----------------------------|-------|-------|-------|------|-------|
|         |     |     |    |      |      |      |      |      | brownish gray              |       |       |       |      |       |
| SST1P4  | 2   | 16  | 40 | 9.6  | 14.9 | 7    | 66.4 | 4.49 | Brown                      | 45    | 21.25 | 33.75 | 0.12 | 112   |
| SST1P5  | 0   | 13  |    | 6    | 10.6 | 7    | 66.4 | 4.52 | Dark grayish<br>Brown      | 20    | 18.75 | 61.25 | 0.1  | 63    |
| SST1P6  | 0   | 8   | 0  | 6.7  | 5.5  | 7.5  | 45.6 | 5.36 | Brown                      | 27.5  | 40    | 32.5  | 0.14 | 97    |
| SST1P7  | 0   | 7   | 29 | 4.6  | 6.8  | 7.5  | 45.6 | 5.32 | Brown                      | 17.5  | 26.25 | 56.25 | 0.11 | 52    |
| SST1P8  | 0   | 17  | 29 | 4.8  | 3.3  | 7    | 45.6 | 4.78 | Light<br>brownish gray     | 15    | 47.5  | 37.5  | 0.15 | 84    |
| SST1P9  | 0   | 7   | 0  | 2.6  | 4.4  | 7.5  | 66.4 | 4.98 | Pale brown                 | 12.5  | 50    | 37.5  | 0.15 |       |
| SST2P1  | 2   | 30  | 30 | 7.5  | 22.2 | 7.5  | 12.4 | 4.61 | Brown                      | 37.5  | 36.25 | 26.25 | 0.15 | 107   |
| SST2P10 | 3.5 | 8.5 | 40 | 8.4  | 31.5 | 7.5  | 12.4 | 5.37 | Brown                      | 45.16 | 37.63 | 17.21 | 0.15 | 209   |
| SST2P2  | 4   | 18  | 30 | 7.5  | 25.6 | 7.5  | 12.4 | 4.49 | Brown                      | 52.5  | 25    | 22.5  | 0.14 | 156   |
| SST2P3  | 6   | 13  | 20 | 6.6  | 17   | 7.5  | 12.4 | 5.24 | Brown                      | 50    | 28.75 | 21.25 | 0.14 | 184   |
| SST2P5  | 7   | 14  | 40 | 10.1 | 17.5 | 7.5  | 12.4 | 5.06 | Brown                      | 45    | 23.75 | 31.25 | 0.13 | 183   |
| SST2P6  | 5   | 10  | 30 | 5.9  | 20.5 | 7.5  | 12.4 | 5.17 | Brown                      | 52.5  | 30    | 17.5  | 0.14 | 146   |
| SST2P7  | 4   | 9   | 20 | 7.4  | 23   | 7.5  | 12.4 | 5.29 | Brown                      | 50    | 37.5  | 12.5  | 0.15 | 170   |
| SST2P8  | 3   | 6   | 20 | 9    | 27.1 | 7.5  | 12.4 | 5.08 | Brown                      | 57.5  | 20    | 22.5  | 0.13 | 280   |
| SST2P9  | 3   | 9   | 30 | 9.1  | 30.2 | 7.5  | 12.4 | 5.4  | Brown                      | 62.5  | 20    | 17.5  | 0.13 | 708   |
| SST3P1  | 0   | 12  | 0  | 8.5  | 46.5 | 7.5  | 12.4 | 5.72 | Brown                      | 46.25 | 31.25 | 22.5  | 0.14 | 182   |
| SST3P2  | 5   | 13  | 10 | 8    | 43.5 | 15   | 12.4 | 6.34 | Brown                      | 55    | 17.5  | 27.5  | 0.12 | 153   |
| SST3P3  | 7   | 14  | 32 | 7.8  | 30.5 | 15   | 12.4 | 4.57 | Brown                      | 50    | 25    | 25    | 0.13 | 150.5 |
| SST3P4  | 3   | 11  | 40 | 8.6  | 30.1 | 15   | 12.4 | 5.83 | Brown                      | 65    | 16.25 | 18.75 | 0.13 | 310   |
| SST3P5  | 2   | 17  | 20 | 9.8  | 45   | 22.5 | 12.4 | 4.22 | Brown                      | 33.57 | 25.83 | 40.6  | 0.12 | 123   |
| SST3P6  | 5   | 11  | 20 | 8.7  | 43.5 | 7.5  | 12.4 | 4.67 | Dark<br>yellowish<br>brown | 51.25 | 13.75 | 35    | 0.12 | 154   |
| SST3P7  | 5   | 8   | 40 | 10.9 | 42   | 7.5  | 12.4 | 4.51 | Dark<br>yellowish<br>brown | 45    | 12.5  | 42.5  | 0.11 | 179   |
| SST3P8  | 3   | 9   | 40 | 13.5 | 34.7 | 7.5  | 12.4 | 5.74 | Brown                      | 46.25 | 12.5  | 41.25 | 0.11 | 269   |
| SST3P9  | 3   | 13  | 60 | 7.3  | 13.9 | 7.5  | 12.4 | 4.66 | Yellowish<br>brown         | 57.5  | 12.5  | 30    | 0.12 | 170   |
| PTWL    |     |     |    |      | 49   | 7    | 12.4 | 6.81 | Brown                      | 36.25 | 11.25 | 52.5  | 0.1  | 519   |
