# Supplementary material
Source: PubMed Central journal article supplement (PMC3790129)
Supplement: 13280_2013_424_MOESM5_ESM.pdf [file 13280_2013_424_MOESM5_ESM.pdf]

**Table S5.** Principle components (PC) of soil properties and their relationship to flood duration. The first three components are significantly correlated to flood duration and their largest variable scores are for clay content, plant available water, and pH, respectively.

|                                | <i>1<sup>st</sup> PC</i> | <i>2<sup>nd</sup> PC</i> | <i>3<sup>rd</sup> PC</i> | <i>4<sup>th</sup> PC</i> |
|--------------------------------|--------------------------|--------------------------|--------------------------|--------------------------|
| Standard deviation             | 1.90                     | 1.68                     | 1.37                     | 1.15                     |
| Cumulative variance proportion | 0.24                     | 0.43                     | 0.55                     | 0.64                     |
|                                | 0.73***                  | 0.24*                    | 0.28*                    | -0.08                    |
|                                | PC scores                |                          |                          |                          |
| Clay content                   | 0.49                     | 0.02                     | 0.05                     | -0.13                    |
| Plant available water          | 0.15                     | 0.50                     | -0.25                    | 0.13                     |
| pH                             | -0.06                    | 0.25                     | 0.47                     | -0.16                    |
| N content                      | 0.07                     | 0.09                     | 0.22                     | 0.62                     |
| Sand content                   | -0.40                    | -0.33                    | 0.14                     | -0.05                    |
| Color dry soil                 | -0.16                    | 0.37                     | 0.16                     | -0.32                    |
| K content                      | -0.09                    | 0.14                     | -0.43                    | -0.16                    |
| Electrical conductivity        | 0.35                     | 0.15                     | 0.12                     | -0.37                    |
| Organic matter content         | 0.36                     | -0.11                    | 0.09                     | 0.01                     |
| Silt content                   | -0.14                    | 0.45                     | -0.27                    | 0.26                     |
| Color wet soil                 | -0.17                    | 0.36                     | 0.30                     | -0.21                    |
| Moisture content               | 0.35                     | 0.01                     | 0.30                     | 0.29                     |
| A horizon depth                | -0.01                    | -0.06                    | 0.24                     | -0.13                    |
| Organic layer depth            | 0.10                     | -0.23                    | -0.21                    | -0.22                    |
| Mottles content                | 0.33                     | -0.02                    | -0.25                    | -0.14                    |

\*:  $p \leq 0.05$ ; \*\*:  $p \leq 0.01$ ; \*\*\*:  $p \leq 0.001$ .
