# Supplementary material
Source: PubMed Central journal article supplement (PMC3790129)
Supplement: 13280_2013_424_MOESM6_ESM.pdf [file 13280_2013_424_MOESM6_ESM.pdf]

**Table S6.** Coefficient of determination ( $r^2$ ) of the linear relationships of canopy cover, aboveground biomass (AGB), and canopy height as a function of flood duration and principle components (PC) of soils.

| <i>Factors used for the linear statistical model</i> |                          |                          |                          | <i>Coefficient of determination (<math>r^2</math>)</i> |                     |            |
|------------------------------------------------------|--------------------------|--------------------------|--------------------------|--------------------------------------------------------|---------------------|------------|
| <i>Flood Duration</i>                                | <i>2<sup>nd</sup> PC</i> | <i>3<sup>rd</sup> PC</i> | <i>4<sup>th</sup> PC</i> | <i>Canopy height</i>                                   | <i>Canopy cover</i> | <i>AGB</i> |
| x                                                    |                          |                          |                          | 0.256***                                               | 0.103**             | 0.129**    |
| x                                                    | x                        |                          |                          | 0.262**                                                | -                   | 0.139*     |
| x                                                    |                          | x                        |                          | 0.392***                                               | 0.291***            | -          |
| x                                                    |                          |                          | x                        | 0.261***                                               | -                   | 0.154*     |
| x                                                    | x                        | x                        |                          | 0.414***                                               | 0.365***            | 0.236*     |
| x                                                    |                          | x                        | x                        | 0.450***                                               | 0.347***            | 0.332***   |
| x                                                    | x                        | x                        | x                        | 0.593***                                               | 0.459**             | 0.410**    |

\*:  $p \leq 0.05$ ; \*\*:  $p \leq 0.01$ ; \*\*\*:  $p \leq 0.001$ .
