# Supplementary material
Source: PubMed Central journal article supplement (PMC3790129)

Fig. S1. Water levels at Kampong Luong. Data provided by the Mekong River Commission.

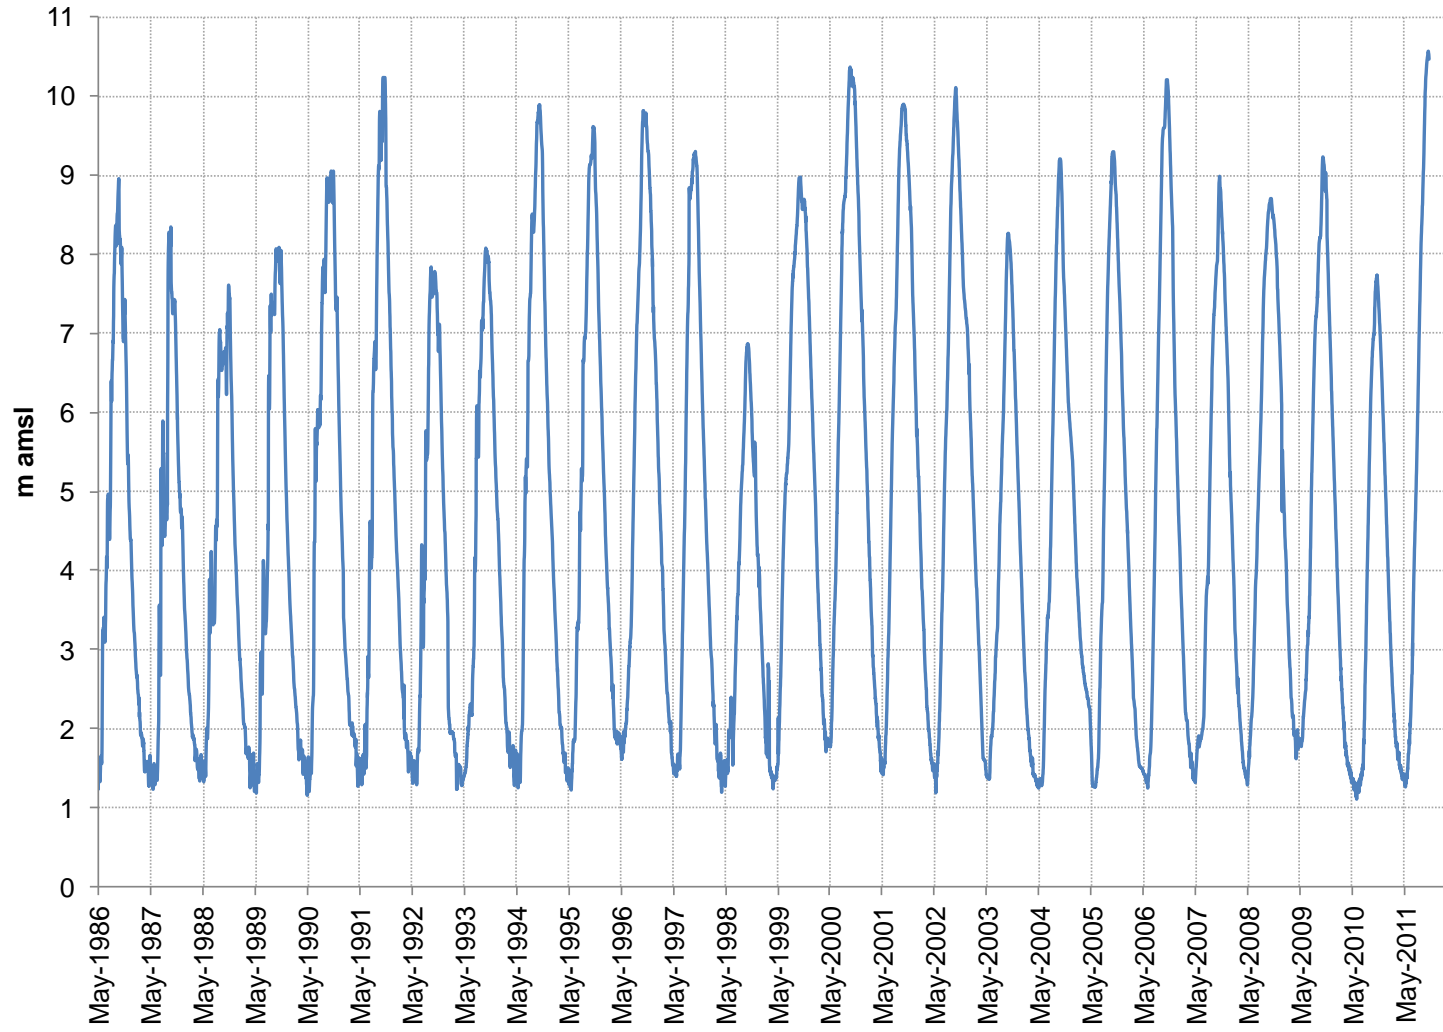

Supplement: 13280_2013_424_MOESM1_ESM.pdf [file 13280_2013_424_MOESM1_ESM.pdf]
